# Supplementary material
Source: Research Square preprint supplement (doi:10.21203/rs.3.rs-9861756/v1)
Supplement: Supplementary file 1 [file ee65c2f4f192d6a695ab9748.docx]

**TABLES** – 1 through 5, one table per page.

**Table 1 - Demographic and clinical data of children and adolescents with laboratory-confirmed SARS-CoV-2 infection with and without PCC.**

| **Variables** | **with PCC**  **(n=12)** | **without PCC**  **(n=40)** | ***p*** |
| --- | --- | --- | --- |
| **Demographic** |  |  |  |
| Age, years | 13.88±3.06 | 14.17±3.02 | 0.77 |
| Female | 7 (58.3) | 24 (60) | 0.92 |
| Number of minimum salaries/months | 1.93±1.48 | 3.01±2.47 | 0.16 |
| **Self-declared race/skin color** | |  | 0.19 |
| Black | 8 (66.7) | 13 (32.5) |  |
| White | 4 (33.3) | 24 (60) |  |
| Yellow | 0 (0) | 2 (5) |  |
| Unknown | 0 (0) | 1 (2.5) |  |
| **Anthropometric data** |  |  |  |
| BMI, kg/m2 | 20.24±5.39 | 22.03±6.12 | 0.37 |
| **Preexisting pediatric condition** | |  | 0.22 |
| Immune | 5 (41.7) | 19 (47.5) |  |
| Neurological | 0 (0) | 0 (0) |  |
| Hepatic or renal | 1 (8.3) | 5 (12.5) |  |
| Oncologic | 2 (16.7) | 5 (12.5) |  |
| Other | 0 (0) | 7 (17.5) |  |
| Healthy | 4 (33.3) | 4 (10) |  |
| **Use of medication** |  |  |  |
| Immunosuppressant | 1 (8.3) | 1 (2.5) | 0.36 |
| Corticosteroid | 2 (16.7) | 13 (32.5) | 0.29 |
| **COVID-19 presentation** |  |  |  |
| Severe form | 3 (25) | 5 (12.5) | 0.92 |
| ICU stay | 2 (16.7) | 3 (7.5) | 0.80 |

Results are presented in n (%), median (minimum-maximum values), mean ± standard deviation, BMI - body mass index, *p* – p value, PCC (post COVID-19 condition), and ICU – intensive care unit.

**Table 2 - PODCI standardized score of children and adolescents with laboratory-confirmed SARS-CoV-2 infection with and without PCC.**

| **PODCI domain** | **with PCC**  **(n=12)** | **without PCC**  **(n=40)** | ***p*** |
| --- | --- | --- | --- |
| **PODCI from children (caregiver report)** | n = 3 | n = 6 |  |
| Global | 70.33±21.13 | 90.33±12.03 | 0.26 |
| Upper Limb | 86.33±17.21 | 95.33±05.32 | 0.55 |
| Transfer and Basic Mobility | 83.33±26.31 | 97.50±03.99 | 0.55 |
| Sports and Physical Function | 61.00±21.65 | 88.17±15.97 | 0.07 |
| Pain | 50.33±44.28 | 80.67±29.96 | 0.26 |
| Happiness | 88.33±16.07 | 90.33±12.03 | 0.65 |
| **PODCI from adolescents (caregiver report)** | n = 9 | n = 34 |  |
| Global | 68.78±26.43 | 85.76±13.81 | **0.02** |
| Upper Limb | 84.22±30.00 | 93.82±12.20 | 0.67 |
| Transfer and Basic Mobility | 82.78±32.34 | 95.61±09.35 | **0.02** |
| Sports and Physical Function | 62.89±29.69 | 78.09±19.84 | 0.07 |
| Pain | 45.56±30.06 | 75.53±27.13 | 0.08 |
| Happiness | 60.89±25.56 | 76.56±18.57 | **0.04** |
| **PODCI from adolescents (self- report)** | n = 9 | n = 34 |  |
| Global | 74.63±20.54 | 84.31±12.44 | 0.14 |
| Upper Limb | 90.25±21.31 | 94.94±09.51 | 0.81 |
| Transfer and Basic Mobility | 84.63±33.25 | 97.32±05.03 | 0.16 |
| Sports and Physical Function | 65.75±30.94 | 78.27±17.95 | 0.31 |
| Pain | 58.13±23.87 | 65.67±28.78 | 0.39 |
| Happiness | 78.75±15.53 | 80.82±22.52 | 0.81 |

Results are presented in n (%), median (minimum-maximum values), mean ± standard deviation. PODCI score answered by caregivers of children (2-10 years and 11 months), by caregivers of adolescents (11-18 years and 11 months) and self-reported by adolescents. PCC (post COVID-19 condition).

**Table 3 - Functional musculoskeletal characteristics of children and adolescents with laboratory-confirmed SARS-CoV-2 infection with and without PCC.**

| **Variable** | **with PCC**  **(n=11)** | **without PCC**  **(n=35)** | ***p*** |
| --- | --- | --- | --- |
| **10mWT** | n = 9 | n = 31 |  |
| Time (s) | 10.04 (4.26-13.58) | 8.45 (6.07-15.86) | 0.05 |
| **TUG** | n = 11 | n = 35 |  |
| Time (s) | 8.69 (6.21-12.75) | 9.21(5.81-12.99) | 0.39 |
| **Handgrip strength test** | n = 10 | n = 31 |  |
| Right side (Kgf) | 22.50±7.68 | 20.93±9.21 | 0.63 |
| Left side (Kgf) | 19.13±6.77 | 19.41±9.69 | 0.93 |
| **Musculoskeletal** **US** | n = 10 | n = 30 |  |
| *Rectus* *femoris* (cm) | 0.99±0.31 | 1.19±0.27 | 0.06 |
| *Vastus* *intermedius* (cm) | 0.90±0.29 | 1.14±0.30 | **0.03** |
| Thigh muscle thickness (cm) | 1.89±0.56 | 2.33±0.45 | **0.015** |

Results are presented in n (%), median (minimum-maximum values), mean ± standard deviation. PCC (post COVID-19 condition). 10mWT – 10-meter Walk test. TUG – “Timed Up and Go”. US – ultrasound.

**Table 4 - Frequencies of selected genetic polymorphisms of children and adolescents with and without PCC.**

| Polymorphisms | with PCC | without PCC | *p* | OR | CI 95% |
| --- | --- | --- | --- | --- | --- |
|  | **(n=12)** | **(n=39)** |  |  |  |
| *OPRM1* (rs1799971) | |  |  |  |  |
| AA | 10 (83.3) | 29 (74.4) |  | 1.00 |  |
| AG | 2 (16.7) | 8 (20.5) | 0.71 | 0.72 | 0.13-4.00 |
| GG | 0 (0) | 2 (5.1) | >0.99 | 0 | 0-6.79 |
| *OPRM1* (rs1799972) | |  |  |  |  |
| CC | 7 (58.3) | 33 (84.6) |  | 1.00 |  |
| CT | 5 (41.7) | 6 (15.4) | 0.06 | 3.9 | 0.93-16.58 |
| TT | 0 (0) | 0 (0) | - | - | - |
| *BDNF* (rs6265) |  |  |  |  |  |
| CC | 11 (91.7) | 28 (71.8) |  | 1.00 |  |
| CT | 1 (8.3) | 10 (25.6) | 0.27 | 0.25 | 0.03-2.23 |
| TT | 0 (0) | 1 (2.6) | >0.99 | 0 | 0-23.73 |
| *IL6* (rs1800796) |  |  |  |  |  |
| GG | 10 (83.3) | 33 (84.6) |  | 1.00 |  |
| GC | 2 (16.7) | 6 (15.4) | 0.91 | 1.10 | 0.19-6.33 |
| CC | 0 (0) | 0 (0) | - | - | - |
| *IL6* (rs1800795) |  |  |  |  |  |
| CC | 1 (8.3) | 5 (12.8) |  | 1.00 |  |
| CG | 3 (25) | 10 (25.6) | 0.75 | 1.50 | 0.12-18.36 |
| GG | 8 (66.7) | 24 (61.5) | 0.66 | 1.66 | 0.17-16.48 |
| *IL1B* (rs16944) |  |  |  |  |  |
| AA | 2 (16.7) | 10 (25.6) |  | 1.00 |  |
| AG | 2 (25) | 14 (35.9) | 0.94 | 1.07 | 0.15-7.64 |
| GG | 7 (58.3) | 15 (38.5) | 0.35 | 2.33 | 0.40-13.61 |
| *TNF* (rs1800629) | |  |  |  |  |
| GG | 10 (83.3) | 27 (69.2) |  | 1.00 |  |
| GA | 2 (16.7) | 11 (28.2) | 0.40 | 0.49 | 0.09-2.61 |
| AA | 0 (0) | 1 (2.6) | >0.99 | 0 | 0-25.2 |
| *IL28B* (rs8099917) | |  |  |  |  |
| TT | 10 (83.3) | 26 (66.7) |  | 1.00 |  |
| TG | 0 (0) | 13 (33.3) | **0.004** | **0** | **0-0.87** |
| GG | 2 (16.7) | 0 (0) | 0.09 | ∞ | 1.05-∞ |
| *IL28B* (rs12979860) | |  |  |  |  |
| CC | 3 (25) | 14 (35.9) |  | 1.00 |  |
| CT | 5 (41.7) | 21 (53.8) | 0.89 | 1.11 | 0.23-5.41 |
| TT | 4 (33.3) | 4 (10.3) | 0.10 | 4.67 | 0.72-30.11 |

Results are presented in n (%), odds ratio – OR and confidence interval – CI 95% (minimum value and maximum value). PCC (post COVID-19 condition).

**Table 5** - Multivariate logistic regression model of associated pediatric post COVID-19 condition variables

| Variable in  pediatric PCC model | *p* | OR | 95% CI |
| --- | --- | --- | --- |
| PODCI – pain domain | 0.011 | 0.95 | 0.91-0.99 |
| Tigh muscle thickness US | 0.019 | 0.021 | 0.001-0.53 |
| *OPRM1* (rs1799972) | 0.016 | 30.98 | 1.88-511.29 |

*Omnibus coefficient p=0.000; Nagelkerke R2=0.606; Hosmer-Lemeshow test p=0.602, Results are presented in n (%), odds ratio – OR and confidence interval – CI 95% (minimum value and maximum value), PCC (post COVID-19 condition). US – ultrasound.
